# Supplementary material for: Bound polyphenols in insoluble dietary fiber of navel orange peel modulate LPS-induced intestinal-like co-culture inflammation through CSF2-mediated NF-κB/JAK-STAT pathway
Source: Royal Society of Chemistry journal article supplement (doi:10.1039/d3fo05579e), 2024-01-01

**Fig. 1B**

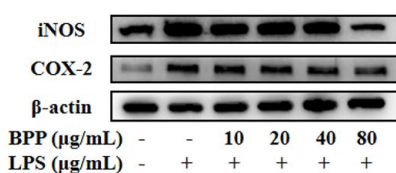

**Unedited figures in fig. 1B**

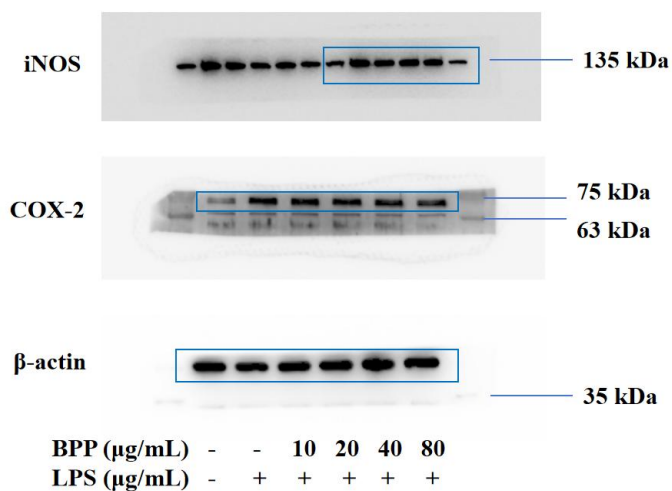

**Fig. 5A**

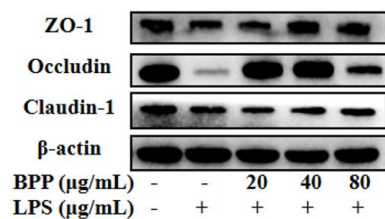

**Unedited figures in fig. 5A**

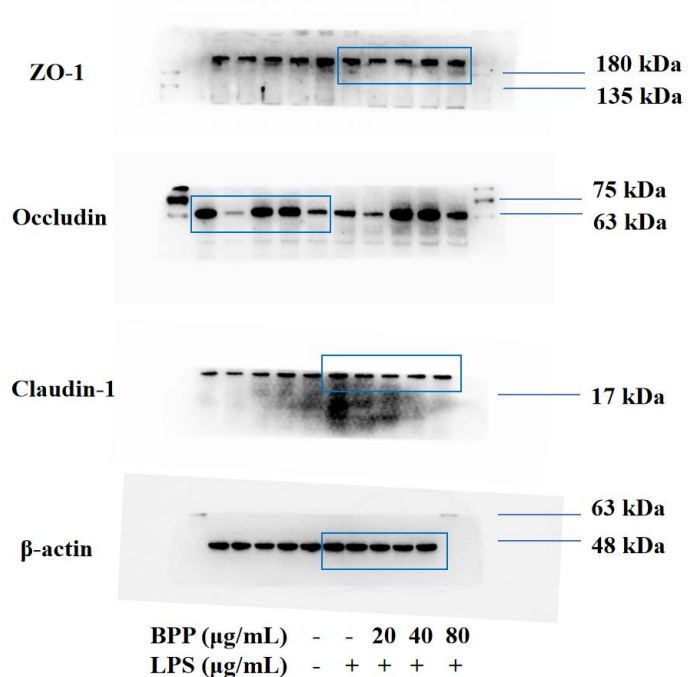

**Fig. 8A**

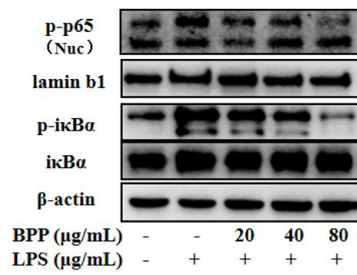

**Unedited figures in fig. 8A**

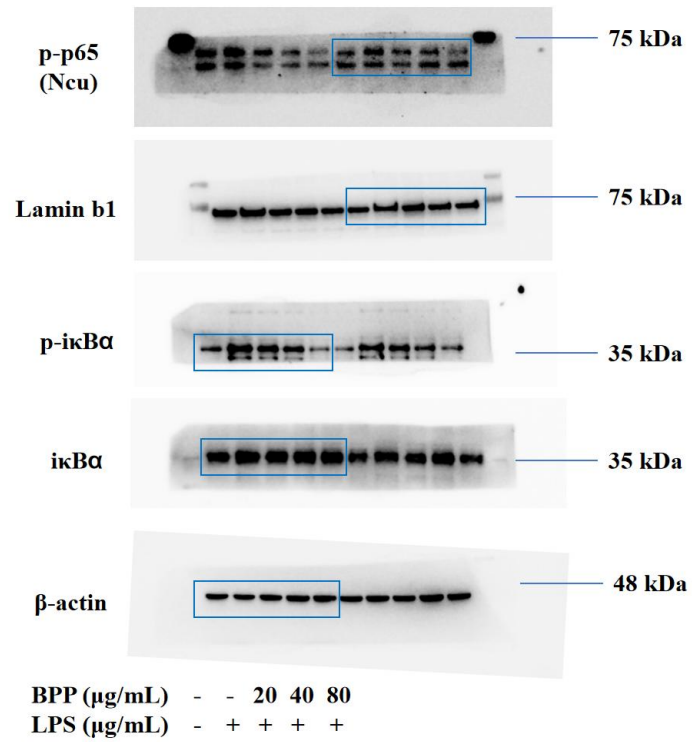

**Fig. 8D**

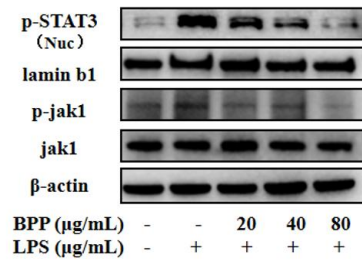

**Unedited figures in fig. 8D**

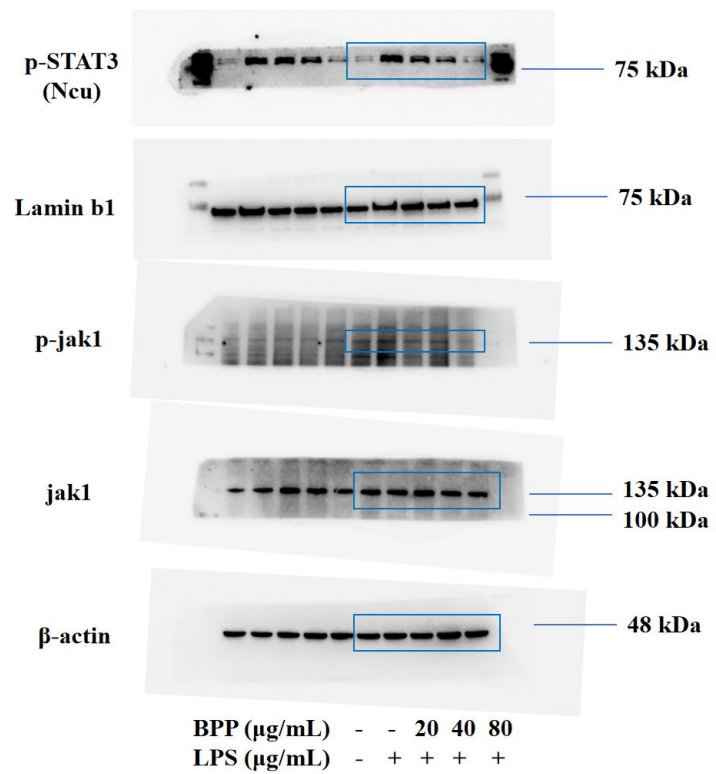

**Fig. 10A**

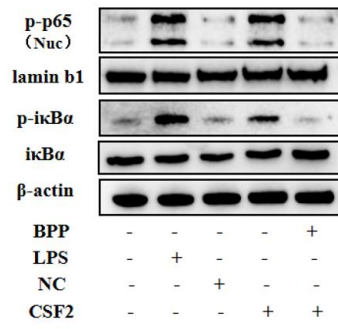

**Unedited figures in fig. 10A**

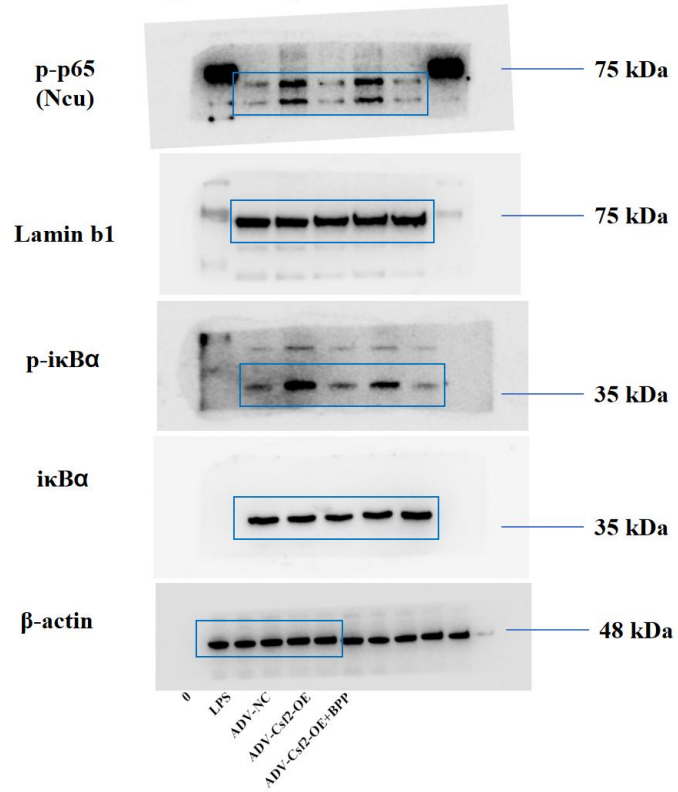

**Fig. 10D**

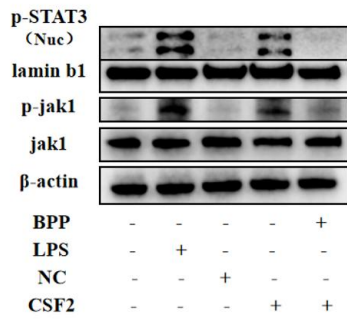

**Unedited figures in fig. 10D**

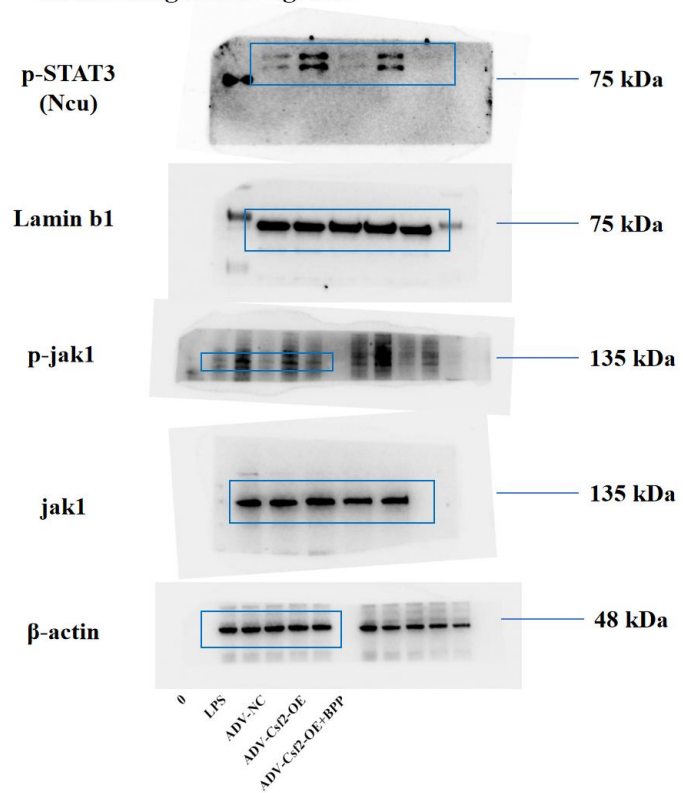

Supplement: d3fo05579e1.pdf [file d3fo05579e1.pdf]
